# Supplementary material for: High-performance piezoelectric-energy-harvester and self-powered mechanosensing using lead-free potassium–sodium niobate flexible piezoelectric composites
Source: Royal Society of Chemistry journal article supplement (doi:10.1039/c8ta05887c), 2018-01-01
Supplement: c8ta05887c1.pdf [file c8ta05887c1.pdf]

Electronic Supplementary Material (ESI) for Journal of Materials Chemistry A.

This journal is © The Royal Society of Chemistry 2018

## Supporting Information

# High Performance Piezoelectric Energy Harvester and Self-powered Mechanosensing Using Lead Free Potassium–Sodium Niobate Flexible Piezoelectric Composites

Mengjun Wu,<sup>a</sup> Ting Zheng,<sup>b</sup> Haiwu Zheng,<sup>\*a</sup> Jifang Li,<sup>c</sup> Weichao Wang,<sup>a</sup> Mingsai  
Zhu,<sup>a</sup> Fengzhu Li,<sup>a</sup> Gentian Yue,<sup>\*a</sup> Yuzong Gu<sup>a</sup> and Jiagang Wu<sup>\*b</sup>

*a Henan Key Laboratory of Photovoltaic Materials, School of Physics and Electronics, Henan  
University, Kaifeng 475004, China*

*b Department of Materials Science, Sichuan University, Chengdu 610064, China*

*c School of Electric Power, North China University of Water Resources and Electric Power,  
Zhengzhou 450045, China*

---

\* Corresponding author. Tel/fax: +86-371-23881602.

E-mail address: [zhenghaiw@ustc.edu](mailto:zhenghaiw@ustc.edu); [yuegentian@126.com](mailto:yuegentian@126.com); [msewujg@scu.edu.cn](mailto:msewujg@scu.edu.cn)

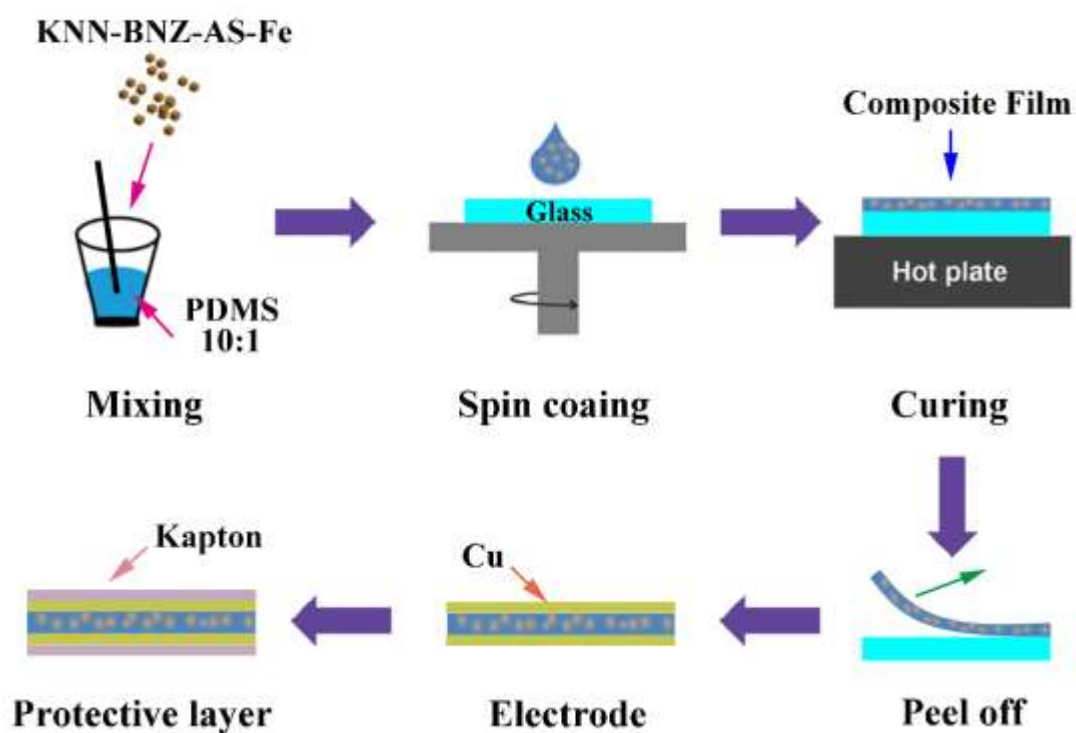

**Figure S1.** Schematic of the detailed fabrication procedure of the PENG device.

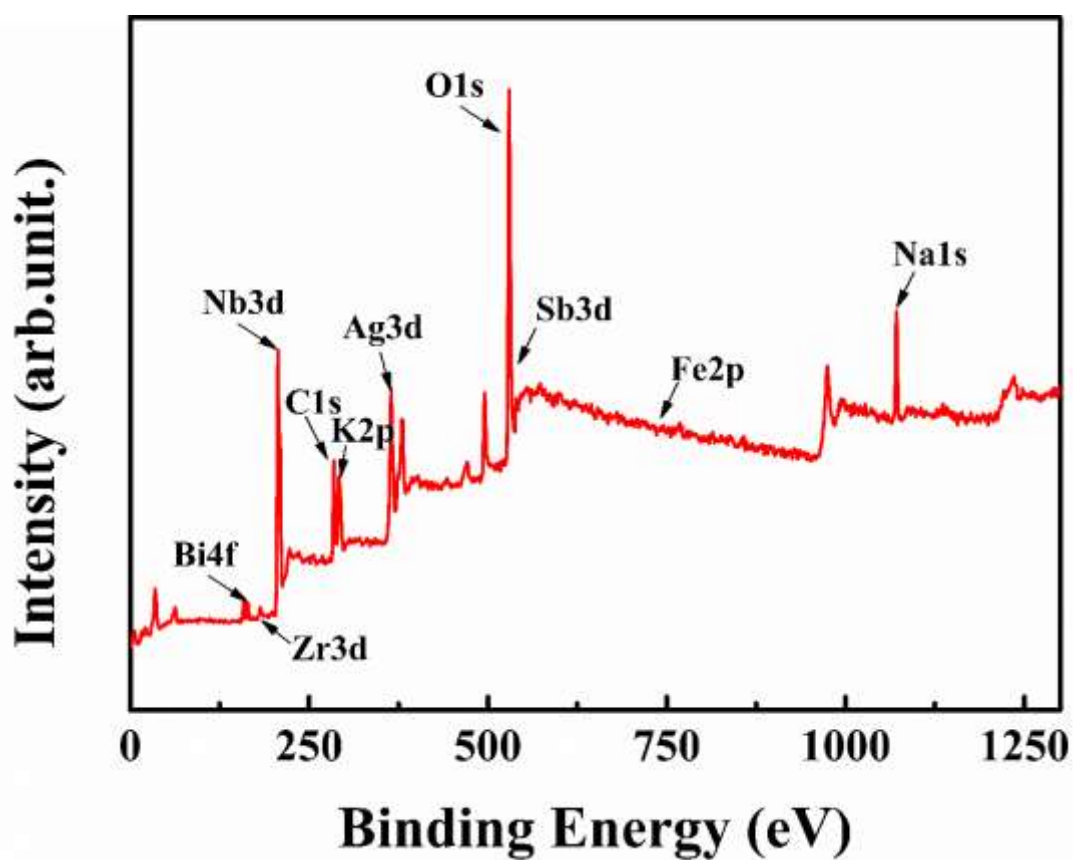

**Figure S2.** XPS spectrum of the KNN-BNZ-AS-Fe particles.

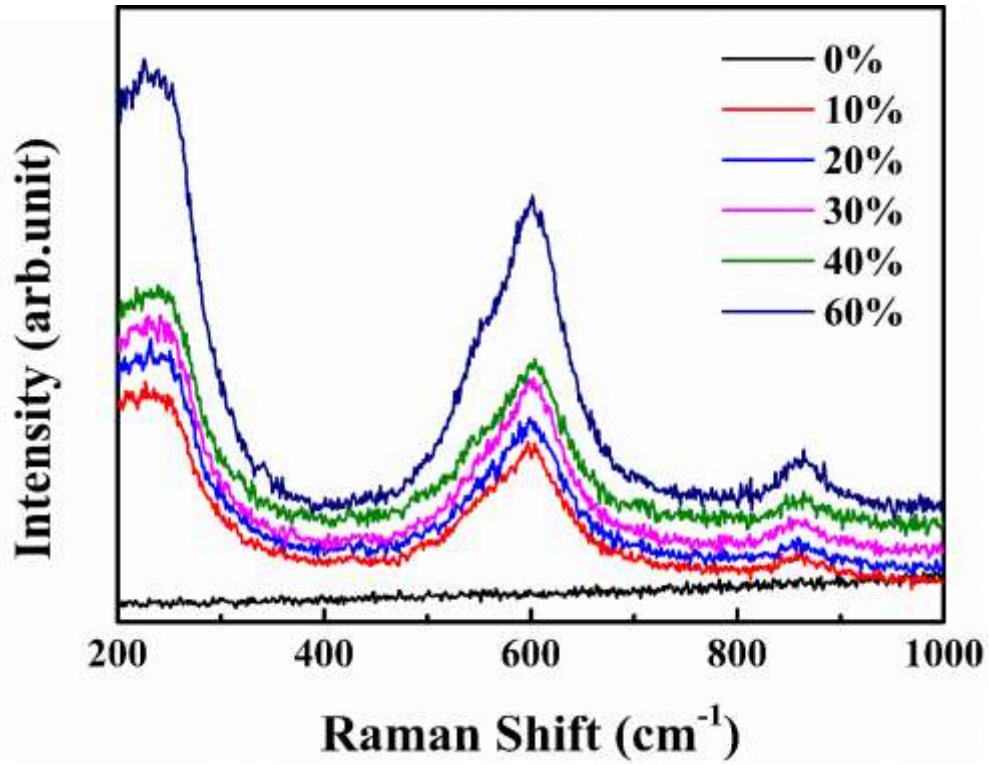

**Figure S3.** Raman spectra of KNN-BNZ-AS-Fe based composite films.

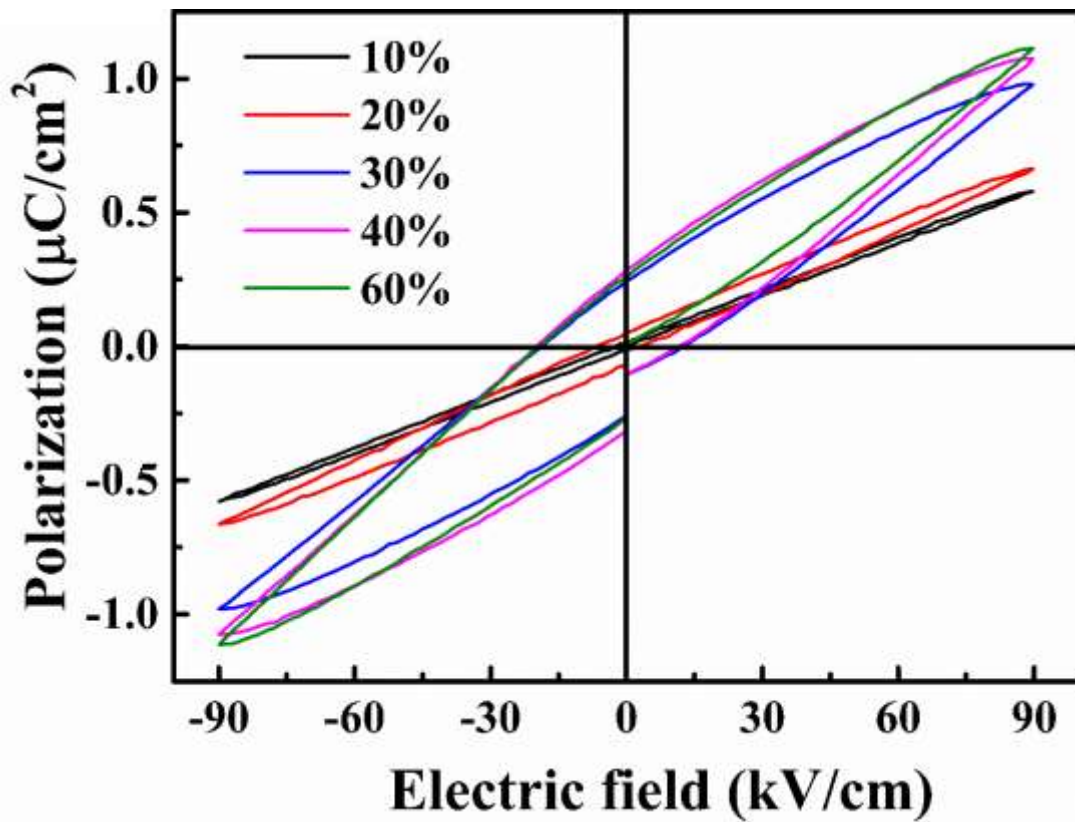

**Figure S4.** Ferroelectric hysteresis loops of composite films with various KNN-BNZ-AS-Fe concentrations.

**Supplementary movie. 1.** Movie showing the 10 commercial green LEDs lit up by the electrical energy generated from the PENG.

**Supplementary movie. 2.** Movie showing the behavior and process of the counter integrated with the PENG device with and without the inorganic particles under the pressure by the finger touch.

**Supplementary movie. 3.** Movie showing the working demonstration of a self-powered smart collision alarm system.
